# Supplementary material
Source: publisher figshare collection journal article supplement (https://tandf.figshare.com/ndownloader/files/20109560)
Supplement: Supplementary file 1 [file 20109560]

Surface-enhanced Raman Spectroscopy with Partial Least Squares Regression for Rapid and Accurate Detection of Malachite Green in Aquaculture Water Using Large-size Gold Nanoparticles

Xinhui Zhoua,b,c,d Zhen Lia,b,c,d Yinfeng Haoa,b,c,d Qingling Duana,b,c,d Cong Wanga,b,c,d Tan Wanga,b,c,d Daoliang Lia,b,c,d*

a College of Information and Electrical Engineering, China Agricultural University, Beijing, 100083, China

b China-EU Center for Information and Communication Technologies in Agriculture, China Agricultural University, Beijing 100083, China

c Key Laboratory of Agricultural Information Acquisition Technology, Ministry of Agriculture, China Agricultural University, Beijing 100083, China

d Beijing Engineering and Technology Research Center for Internet of Things in Agriculture, China Agricultural University, Beijing 100083, China

Corresponding author E-mail：[dliangl@cau.edu.cn](mailto:dliangl@cau.edu.cn)

Table S1 Analytical results in MG standard solution(n=5)

| Sample | Added  (μmol L-1) | Found  (μmol L-1) | Recovery (%) | RSD (%) |
| --- | --- | --- | --- | --- |
| MG standard solution | 0.01 | 0.014 | 141.4 | 5.3 |
|  | 0.05 | 0.052 | 104.6 | 6.2 |
|  | 0.1 | 0.103 | 103.3 | 4.1 |
|  | 0.2 | 0.198 | 98.1 | 1.2 |
|  | 0.5 | 0.502 | 100.5 | 1.1 |
|  | 1.0 | 0.982 | 98.2 | 1.3 |
|  | 2.0 | 2.036 | 101.8 | 1.1 |
|  | 5.0 | 5.046 | 101.2 | 1.7 |
